# Supplementary material for: Steric effect induces CO electroreduction to CH4 on Cu–Au alloys
Source: Royal Society of Chemistry journal article supplement (doi:10.1039/d1ta06162c), 2021-01-01
Supplement: d1ta06162c1.pdf [file d1ta06162c1.pdf]

*Supporting Information for*

**Steric effect induces CO electroreduction to CH<sub>4</sub> on Cu–Au alloys**

*Anxiang Guan,<sup>a</sup> Qihao Wang,<sup>a</sup> Yali Ji,<sup>a</sup> Si Li,<sup>a</sup> Chao Yang,<sup>a</sup> Linping Qian,<sup>a</sup> Lijuan Zhang,<sup>a</sup>*

*Limin Wu,<sup>b</sup> Gengfeng Zheng<sup>a,\*</sup>*

<sup>a</sup>Laboratory of Advanced Materials, Department of Chemistry and Shanghai Key Laboratory of Molecular Catalysis & Innovative Materials, Faculty of Chemistry and Materials Science, Fudan University, Shanghai 200438, China.

<sup>b</sup>Department of Materials Science and State Key Laboratory of Molecular Engineering of Polymers, Fudan University, Shanghai 200438, China.

\*Corresponding authors: Gengfeng Zheng

Email: gfzheng@fudan.edu.cn

## Supplementary Methods

### Electrochemical measurements

Electroreduction measurements were conducted on an Autolab PGSTAT30 (Netherlands) with a three-electrode flow cell at ambient conditions. A gas-diffusion electrode painted with IrO<sub>2</sub> catalyst (1 mg·cm<sup>-2</sup>) and an Ag/AgCl (3 M KCl) were used as the counter and reference electrodes, respectively. A gas-diffusion electrode with a catalyst loading of 1 mg·cm<sup>-2</sup> was used as working electrode. All applied potentials were converted into the reversible hydrogen electrode (RHE) scale by adding a value of (0.21 + 0.0591\*pH) V. A KOH aqueous solution (1 M, pH 14) was served as the electrolyte. For the Faradaic efficiency analysis, gas and liquid products were quantified by in-line gas chromatograph (Shanghai Ramiin GC 2060) and <sup>1</sup>H NMR on Bruker AVANCEAV III HD 500, respectively.

### DFT Calculations

Density functional theory (DFT) calculations were conducted using the Vienna *Ab initio* Simulation Package (VASP). The Perdew-Burke-Ernzerhof (PBE) and a supercell with a plane-wave basis sets (with a kinetic energy cutoff of 400 eV) was employed for the DFT calculations. The top two layers of the target model were set to be relaxed, and the rest several layers of the model were fixed. The final obtained energies were further corrected with the consideration of zero-point energy after geometry optimization for all intermediate states until the total energy of the system was stable with a 0.02 eV/Å force convergence.

## Supplementary Figures

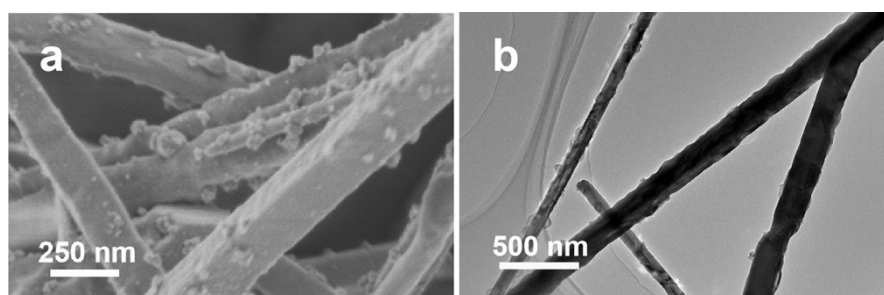

**Fig. S1** High-resolution SEM image (a) and TEM image (b) of Cu nanowires.

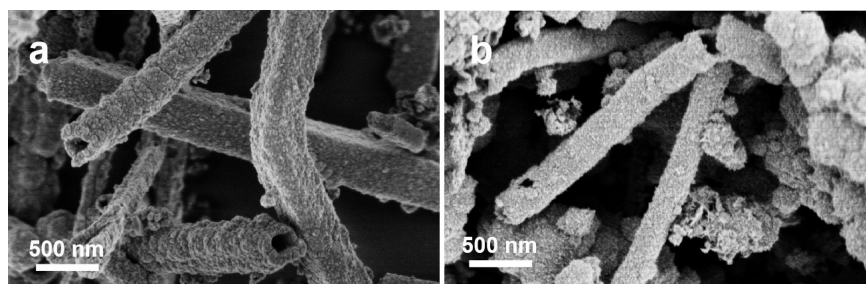

**Fig. S2** The SEM images of (a) Cu<sub>5</sub>Au and (b) CuAu alloy nanowires.

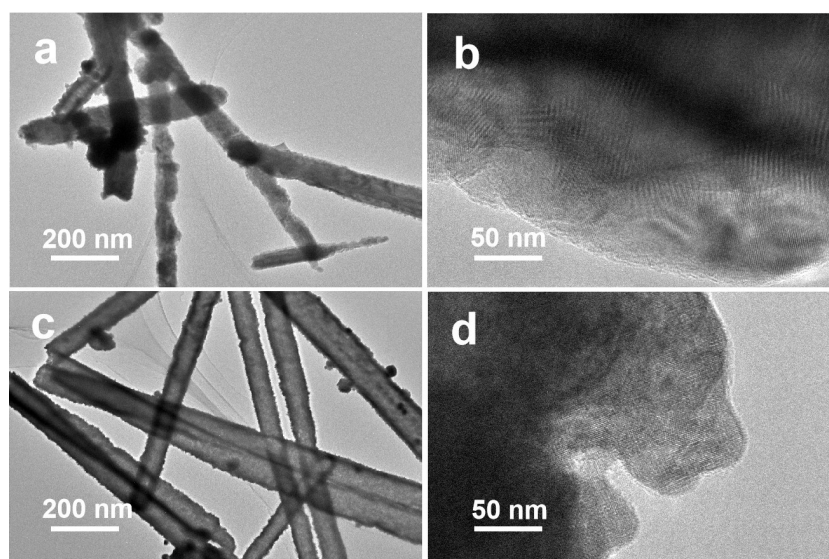

**Fig. S3** Low- and high-resolution TEM images of (a, b)  $\text{Cu}_5\text{Au}$  and (c, d)  $\text{CuAu}$  alloy nanowires.

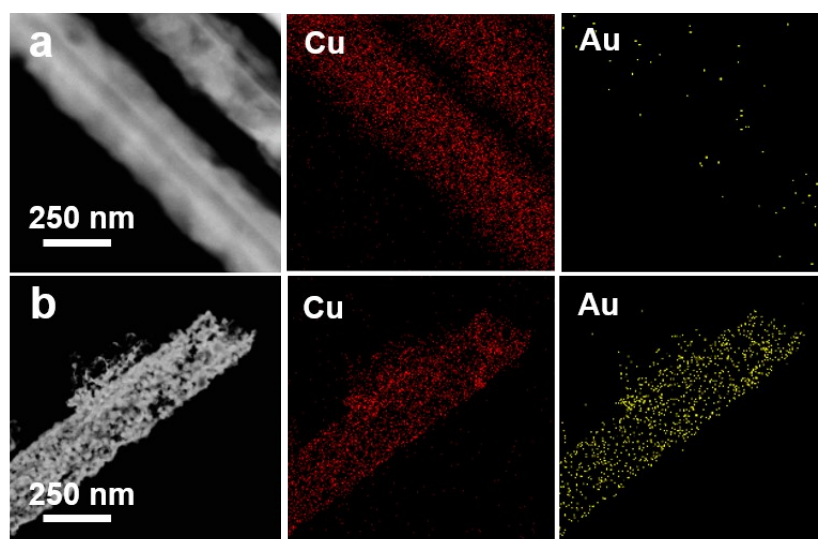

**Fig. S4** EDS elemental mappings of (a)  $\text{Cu}_5\text{Au}$  and (b)  $\text{CuAu}$  alloy nanowires.

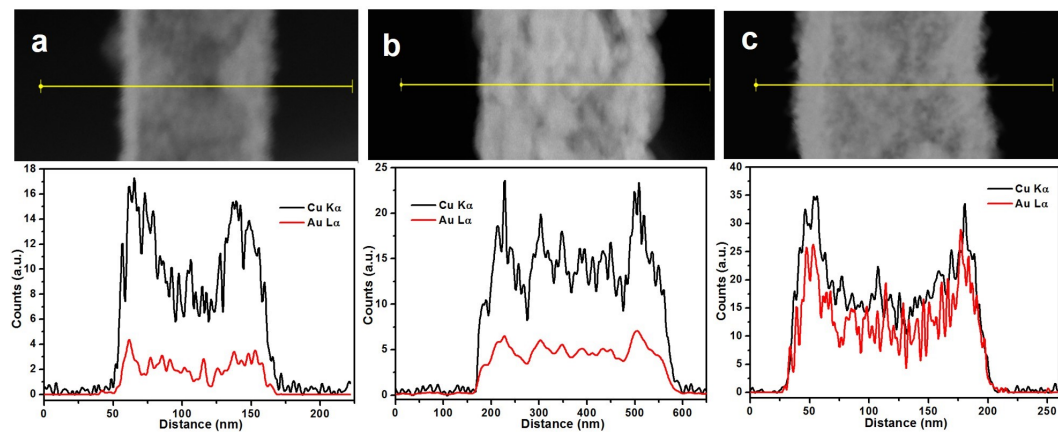

**Fig. S5** Line scan analysis performed on (a)  $\text{Cu}_5\text{Au}$ , (b)  $\text{Cu}_3\text{Au}$ , and (c)  $\text{CuAu}$  alloy nanowires.

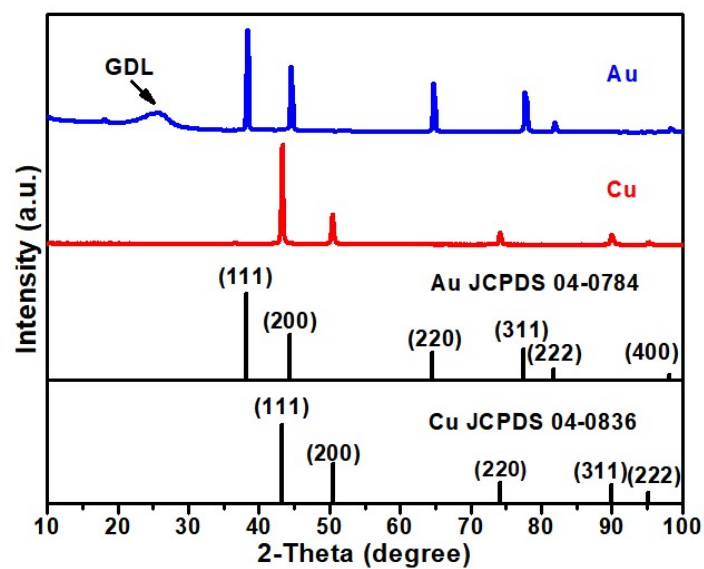

**Fig. S6** XRD patterns of Cu and Au samples. The broad peak at  $26^\circ$  in the XRD pattern of Au was attributed to the characteristic peak of carbon-based gas-diffusion layer (GDL).

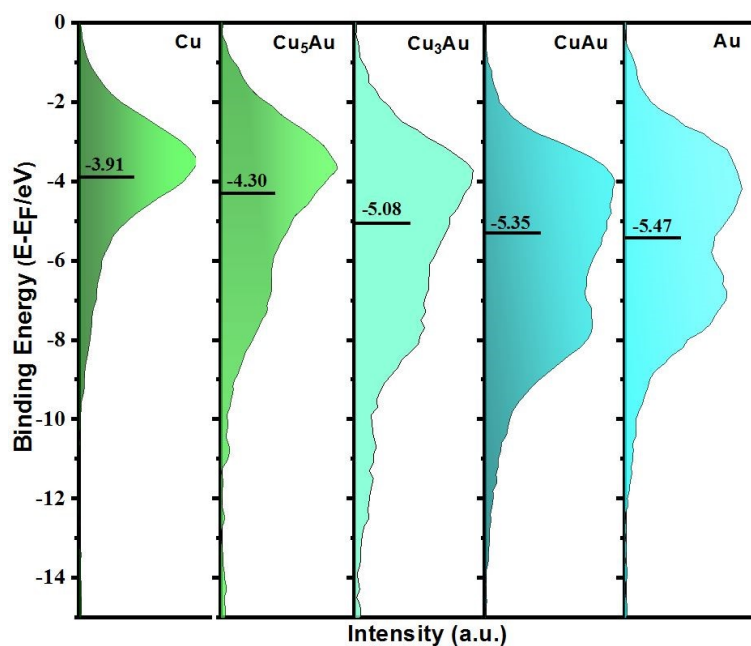

**Fig. S7** Surface valence band photoelectron spectra of Cu, Au and Cu–Au alloy samples. The black bars indicated their d-band centers. For comparison, the lowest binding energy was set to  $-15$  eV in binding energy.

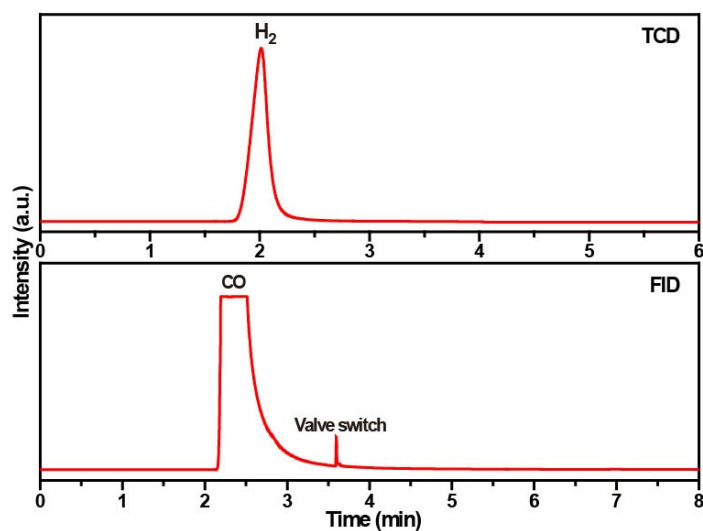

**Fig. S8** Representative gas-chromatography spectra of gas products for CO electroreduction on Au catalyst.

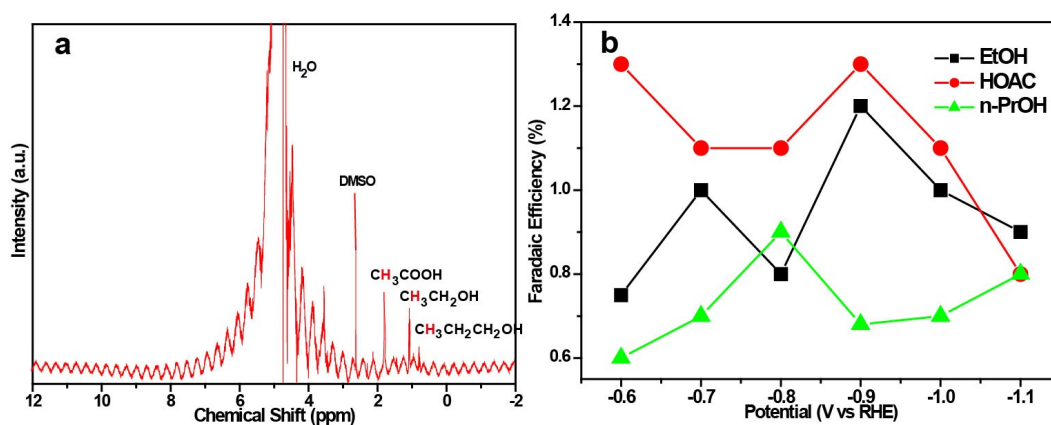

**Fig. S9** (a)  $^1\text{H-NMR}$  spectral data of liquid products for CO electroreduction on Au catalyst (The signal of  $^1\text{H-NMR}$  was derived from the hydrogen atoms highlighted in red), (b) Faradaic efficiencies of liquid products for CO electroreduction on Au catalyst.

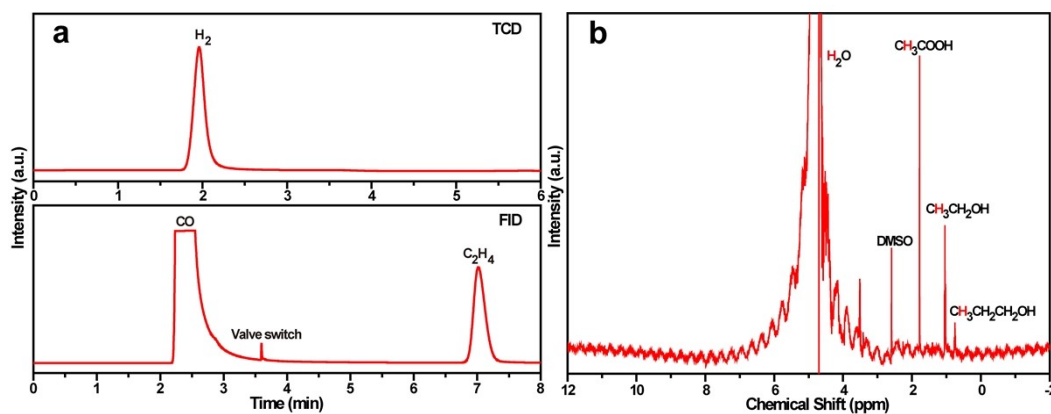

**Fig. S10** (a) Representative gas-chromatography spectra of gas products, and (b)  $^1\text{H-NMR}$  spectral data of liquid products for CO electroreduction on Cu nanowire catalyst (The signal of  $^1\text{H-NMR}$  was derived from the hydrogen atoms highlighted in red).

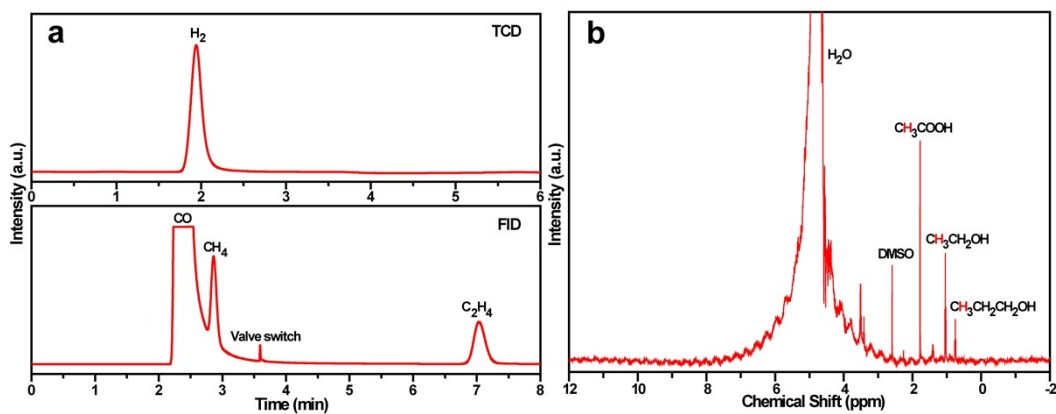

**Fig. S11** (a) Representative gas-chromatography spectra of gas products, and (b) <sup>1</sup>H-NMR spectral data of liquid products for CO electroreduction on Cu<sub>3</sub>Au nanowire catalyst (The signal of <sup>1</sup>H-NMR was derived from the hydrogen atoms highlighted in red).

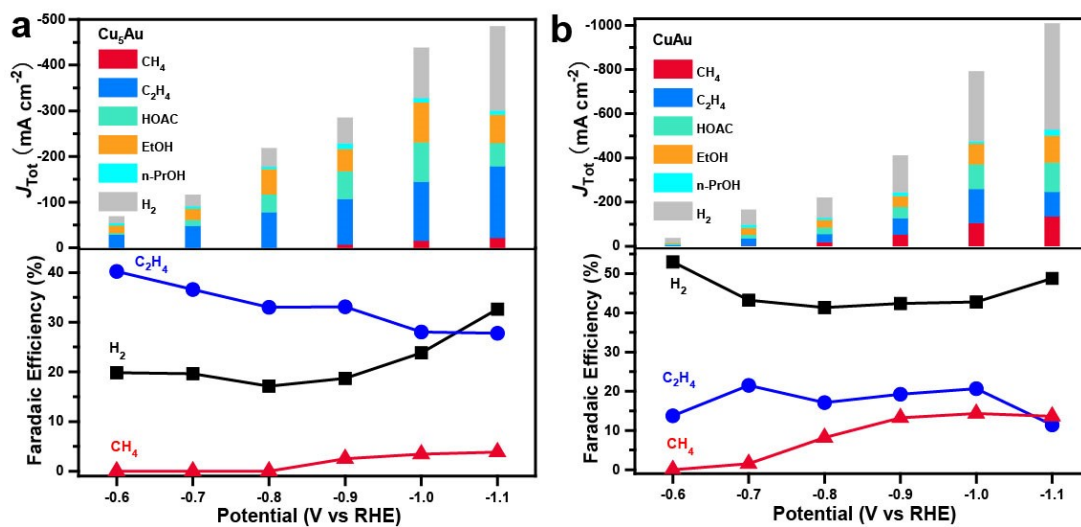

**Fig. S12** CO electroreduction performance of the (a) Cu<sub>5</sub>Au and (b) CuAu alloy catalysts. Top panels: partial current densities with respect to different products. Bottom panels: Faradaic efficiencies of H<sub>2</sub>, C<sub>2</sub>H<sub>4</sub> and CH<sub>4</sub>.



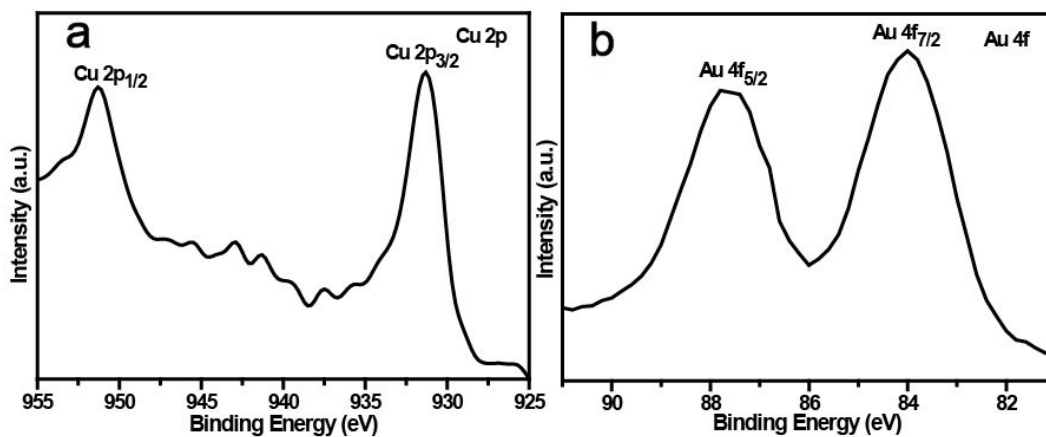

**Fig. S13** (a) Cu 2p and (b) Au 4f XPS spectra of Cu<sub>3</sub>Au after CO electroreduction.

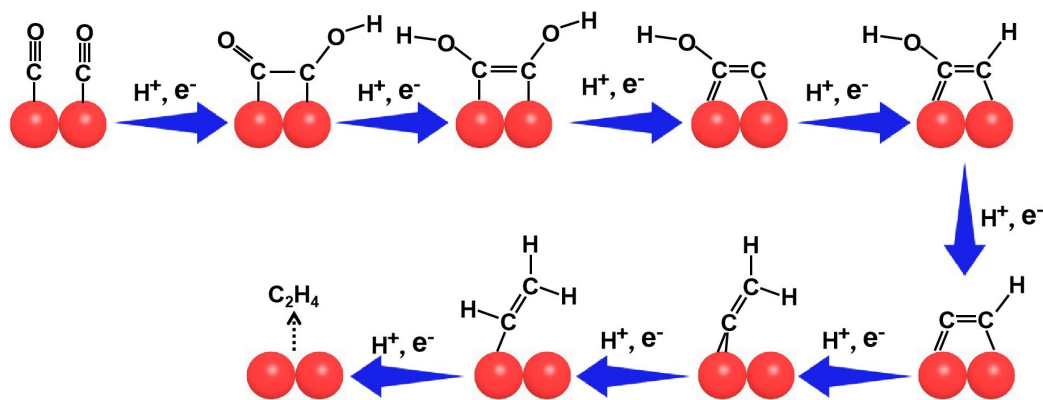

**Fig. S14** The formation mechanism of C<sub>2</sub>H<sub>4</sub> on the Cu surface. The red spheres were denoted

as

Cu

atoms

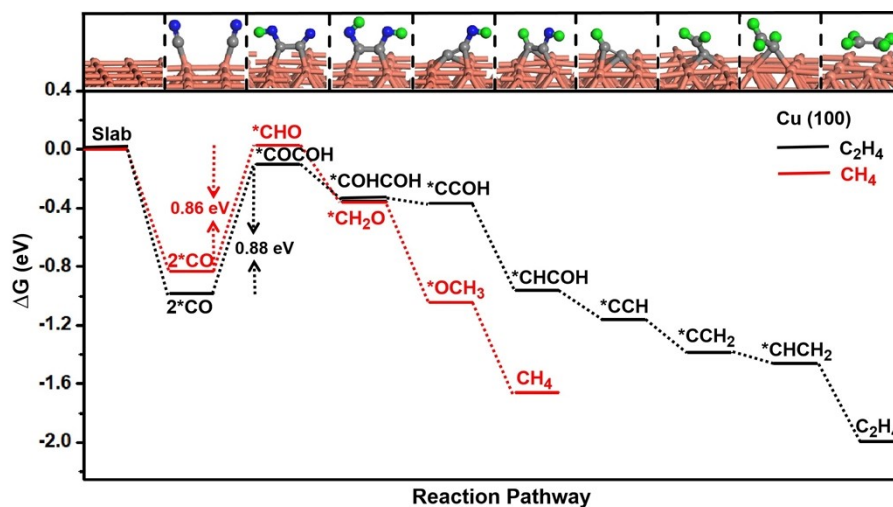

**Fig. S15** Free energy profiles for  $C_2H_4$  and  $CH_4$  generation over Cu (100). The grey, blue and green spheres were denoted as C, O and H atoms, respectively.

**Table S1.** Elemental content in different samples determined by ICP-OES

| Sample ID          | Element | Reported Conc. (mg/L) | Amount of substance (mol) | Molar ratio of Cu : Au |
|--------------------|---------|-----------------------|---------------------------|------------------------|
| Cu <sub>5</sub> Au | Cu      | 3.66                  | 0.058                     | 4.83:1                 |
|                    | Au      | 2.27                  | 0.012                     |                        |
| Cu <sub>3</sub> Au | Cu      | 2.81                  | 0.044                     | 2.93:1                 |
|                    | Au      | 3.01                  | 0.015                     |                        |
| CuAu               | Cu      | 1.84                  | 0.029                     | 1.04:1                 |
|                    | Au      | 5.50                  | 0.028                     |                        |
